# Supplementary material
Source: PubMed Central journal article supplement (PMC2986632)
Supplement: ejhg200948x1.pdf [file ejhg200948x1.pdf]

**Supplementary Table 1.** Characteristics of SNPs used in a 6.16-Mb region around linkage peak at marker D4S3240 on 4q25 in 270 unrelated founders from 240 families

| Marker number | dbSNP number | Alleles | Physical map location (bp) | Distance from previous marker (bp) | Gene            | SNP type   | MAF <sup>a</sup> | <i>P</i> value for departure from HWE <sup>a</sup> |
|---------------|--------------|---------|----------------------------|------------------------------------|-----------------|------------|------------------|----------------------------------------------------|
| 1             | rs12512339   | C/G     | 106812066                  |                                    |                 | Intergenic | 0.067            | 1.0000                                             |
| 2             | rs2553432    | A/G     | 107020489                  | 208423                             |                 | Intergenic | 0.077            | 0.0505                                             |
| 3             | rs2156508    | A/G     | 107125596                  | 105107                             |                 | Intergenic | 0.42             | 1.0000                                             |
| 4             | rs2290607    | C/T     | 107332748                  | 207152                             | <i>MGC16169</i> | Intron 20  | 0.117            | 0.5548                                             |
| 5             | rs2280632    | A/G     | 107593659                  | 260911                             |                 | Intergenic | 0.296            | 0.4700                                             |
| 6             | rs975416     | A/C     | 107793096                  | 199437                             |                 | Intergenic | 0.134            | 0.7877                                             |
| 7             | rs13122611   | A/G     | 107975675                  | 182579                             |                 | Intergenic | 0.239            | 1.0000                                             |
| 8             | rs12508812   | C/T     | 108162183                  | 186508                             | <i>DKK2</i>     | Intron 1   | 0.454            | 0.5392                                             |
| 9             | rs3797004    | A/G     | 108344155                  | 181972                             |                 | Intergenic | 0.203            | 1.0000                                             |
| 10            | rs3797005    | A/G     | 108344321                  | 166                                |                 | Intergenic | 0.492            | 0.3774                                             |
| 11            | rs1001950    | A/C     | 108594423                  | 250102                             |                 | Intergenic | 0.181            | 1.0000                                             |
| 12            | rs1989929    | A/G     | 108633139                  | 38716                              |                 | Intergenic | 0.335            | 0.2044                                             |
| 13            | rs12643758   | A/C     | 108650044                  | 16905                              |                 | Intergenic | 0.382            | 0.4284                                             |
| 14            | rs1877863    | C/T     | 108673974                  | 23930                              |                 | Intergenic | 0.17             | 1.0000                                             |
| 15            | rs2672470    | A/G     | 108683523                  | 9549                               |                 | Intergenic | 0.381            | 0.5148                                             |
| 16            | rs1514728    | G/T     | 108694035                  | 10512                              |                 | Intergenic | 0.49             | 0.4522                                             |
| 17            | rs3936010    | C/G     | 108707307                  | 13272                              |                 | Intergenic | 0.1              | 0.4909                                             |
| 18            | rs1355990    | C/T     | 108711815                  | 4508                               |                 | Intergenic | 0.49             | 0.3836                                             |
| 19            | rs932100     | A/G     | 108726033                  | 14218                              |                 | Intergenic | 0.383            | 0.3507                                             |
| 20            | rs4451005    | A/T     | 108733220                  | 7187                               |                 | Intergenic | 0.346            | 0.8946                                             |
| 21            | rs2726165    | C/T     | 108742465                  | 9245                               |                 | Intergenic | 0.102            | 1.0000                                             |
| 22            | rs9569       | A/G     | 108754784                  | 12319                              | <i>PAPSS1</i>   | 3' UTR     | 0.357            | 0.8913                                             |
| 23            | rs2726670    | A/G     | 108755834                  | 1050                               | <i>PAPSS1</i>   | Intron 11  | 0.5              | 0.9015                                             |
| 24            | rs2726673    | A/C     | 108760731                  | 4897                               | <i>PAPSS1</i>   | Intron 11  | 0.111            | 0.5402                                             |
| 25            | rs4956112    | A/T     | 108772052                  | 11321                              | <i>PAPSS1</i>   | Intron 11  | 0.37             | 0.7876                                             |
| 26            | rs2726659    | A/G     | 108784664                  | 12612                              | <i>PAPSS1</i>   | Intron 10  | 0.105            | 1.0000                                             |
| 27            | rs11934943   | A/G     | 108785058                  | 394                                | <i>PAPSS1</i>   | Intron 10  | 0.364            | 1.0000                                             |
| 28            | rs2271590    | C/T     | 108794554                  | 9496                               | <i>PAPSS1</i>   | Intron 8   | 0.361            | 0.8901                                             |
| 29            | rs973213     | C/T     | 108799656                  | 5102                               | <i>PAPSS1</i>   | Intron 6   | 0.106            | 1.0000                                             |
| 30            | rs4956024    | C/T     | 108812114                  | 12458                              | <i>PAPSS1</i>   | Intron 5   | 0.372            | 0.6778                                             |
| 31            | rs3805346    | C/T     | 108821485                  | 9371                               | <i>PAPSS1</i>   | Intron 5   | 0.103            | 0.7379                                             |

<sup>a</sup>MAF=minor-allele frequency; HWE=Hardy-Weinberg equilibrium

Supplementary Table 1. (Continued)

| Marker number | dbSNP number   | Alleles | Physical map location (bp) | Distance from previous marker (bp) | Gene             | SNP type     | MAF <sup>a</sup> | P value for departure from HWE <sup>a</sup> |
|---------------|----------------|---------|----------------------------|------------------------------------|------------------|--------------|------------------|---------------------------------------------|
| 32            | rs6826884      | A/T     | 108830115                  | 8630                               | <i>PAPSS1</i>    | Intron 3     | 0.39             | 0.0636                                      |
| 33            | rs13110240     | C/T     | 108841924                  | 11809                              | <i>PAPSS1</i>    | Intron 1     | 0.407            | 0.0934                                      |
| 34            | rs2428401      | G/T     | 108845241                  | 3317                               | <i>PAPSS1</i>    | Intron 1     | 0.088            | 0.1236                                      |
| 35            | rs3805350      | A/T     | 108858887                  | 13646                              | <i>PAPSS1</i>    | Intron 1     | 0.411            | 0.0567                                      |
| 36            | rs11934107     | A/G     | 108891440                  | 32553                              |                  | Intergenic   | 0.194            | 0.6910                                      |
| 37            | rs7685557      | C/G     | 108913573                  | 22133                              |                  | Intergenic   | 0.204            | 1.0000                                      |
| 38            | rs4479785      | A/T     | 108931353                  | 17780                              |                  | Intergenic   | 0.203            | 0.8485                                      |
| 39            | rs4395588      | A/G     | 109080427                  | 149074                             | <i>CYP2U1</i>    | Intron 1     | 0.203            | 1.0000                                      |
| 40            | rs7442180      | A/C     | 109096732                  | 16305                              |                  | Intergenic   | 0.216            | 0.6914                                      |
| 41            | rs221330       | A/G     | 109140816                  | 44084                              | <i>HADHSC</i>    | Intron 1     | 0.284            | 0.7624                                      |
| 42            | rs3797001      | C/T     | 109226367                  | 85551                              | <i>LEF1</i>      | Intron 4     | 0.286            | 1.0000                                      |
| 43            | rs2343113      | A/G     | 109324131                  | 97764                              | <i>LOC644993</i> | Intron 2     | 0.257            | 0.4075                                      |
| 44            | rs2649787      | C/T     | 109421043                  | 96912                              |                  | Intergenic   | 0.114            | 0.1111                                      |
| 45            | rs1452397      | A/G     | 109524846                  | 103803                             |                  | Intergenic   | 0.314            | 0.7817                                      |
| 46            | rs7654972      | C/T     | 109626948                  | 102102                             |                  | Intergenic   | 0.371            | 0.5895                                      |
| 47            | rs3796938      | C/T     | 109730683                  | 103735                             |                  | Intergenic   | 0.434            | 0.5357                                      |
| 48            | rs2851374      | C/G     | 109807687                  | 77004                              | <i>DC2</i>       | Intron 3     | 0.301            | 0.6542                                      |
| 49            | rs2305438      | A/G     | 109954162                  | 146475                             | <i>COL25A1</i>   | 3' near gene | 0.456            | 0.7033                                      |
|               | <b>D4S3240</b> |         | <b>110014057</b>           | <b>59895</b>                       |                  |              |                  |                                             |
| 50            | rs4956066      | C/G     | 110112496                  | 98439                              | <i>COL25A1</i>   | Intron 8     | 0.2              | 0.8350                                      |
| 51            | rs2704108      | A/G     | 110292774                  | 180278                             | <i>COL25A1</i>   | Intron 3     | 0.261            | 0.8749                                      |
| 52            | rs978632       | A/C     | 110387308                  | 94534                              | <i>COL25A1</i>   | Intron 3     | 0.262            | 0.6348                                      |
| 53            | rs7700022      | C/G     | 110441670                  | 54362                              | <i>COL25A1</i>   | Intron 2     | 0.412            | 0.3102                                      |
| 54            | rs4698837      | C/G     | 110705171                  | 263501                             | <i>CCDC109B</i>  | Intron 1     | 0.305            | 0.1919                                      |
| 55            | rs2285712      | C/T     | 110826162                  | 120991                             | <i>CCDC109B</i>  | Intron 7     | 0.475            | 0.2143                                      |
| 56            | rs10365        | C/G     | 110965303                  | 139141                             | <i>NOLA1</i>     | 3' UTR       | 0.488            | 0.7072                                      |
| 57            | rs2298979      | A/G     | 111057575                  | 92272                              | <i>EGF</i>       | Intron 1     | 0.319            | 0.4788                                      |
| 58            | rs1060427      | A/G     | 111285251                  | 227676                             | <i>ELOVL6</i>    | Intron 1     | 0.216            | 1.0000                                      |
| 59            | rs6811819      | A/C     | 111393045                  | 107794                             |                  | Intergenic   | 0.331            | 0.3286                                      |
| 60            | rs1126483      | C/T     | 111629154                  | 236109                             | <i>ENPEP</i>     | Exon 2       | 0.344            | 0.8927                                      |
| 61            | rs2739206      | C/G     | 111774158                  | 145004                             | <i>PITX2</i>     | Intron 1     | 0.45             | 1.0000                                      |
| 62            | rs7674295      | A/G     | 111960887                  | 186729                             |                  | Intergenic   | 0.253            | 0.8686                                      |
| 63            | rs159480       | A/G     | 112166883                  | 205996                             |                  | Intergenic   | 0.239            | 0.6147                                      |

<sup>a</sup>MAF=minor-allele frequency; HWE=Hardy-Weinberg equilibrium

**Supplementary Table 1.** (Continued)

| <b>Marker number</b> | <b>dbSNP number</b> | <b>Alleles</b> | <b>Physical map location (bp)</b> | <b>Distance from previous marker (bp)</b> | <b>Gene</b> | <b>SNP type</b> | <b>MAF<sup>a</sup></b> | <b><i>P</i> value for departure from HWE<sup>a</sup></b> |
|----------------------|---------------------|----------------|-----------------------------------|-------------------------------------------|-------------|-----------------|------------------------|----------------------------------------------------------|
| 64                   | rs10857013          | A/G            | 112383233                         | 216350                                    |             | Intergenic      | 0.303                  | 0.6556                                                   |
| 65                   | rs1503669           | A/T            | 112570128                         | 186895                                    |             | Intergenic      | 0.484                  | 0.2574                                                   |
| 66                   | rs7698118           | A/G            | 112777741                         | 207613                                    |             | Intergenic      | 0.329                  | 0.3276                                                   |
| 67                   | rs7682154           | A/G            | 112970661                         | 192920                                    |             | Intergenic      | 0.442                  | 0.2642                                                   |

<sup>a</sup>MAF=minor-allele frequency; HWE=Hardy-Weinberg equilibrium
