# Supplementary material
Source: PubMed Central journal article supplement (PMC2986632)
Supplement: ejhg200948x2.pdf [file ejhg200948x2.pdf]

**Supplementary Table 2.** Discovery of genetic polymorphisms by resequencing the coding sequence of each exon 6 to 12 of the *PAPSSI* gene in 48 sequenced samples<sup>a</sup>

| Type of polymorphism                             | db SNP number | Alleles | Position (bp) | Allelic frequency                       |                        |                       |
|--------------------------------------------------|---------------|---------|---------------|-----------------------------------------|------------------------|-----------------------|
|                                                  |               |         |               | Case patients (n=40)                    | Control subjects (n=8) | HapMap-Han population |
| SNP                                              | rs3733633     | A/G     | 108795438     | 26/54 <sup>b</sup> (32.5 <sup>c</sup> ) | 4/12 (25.0)            | 41.0 <sup>c</sup>     |
| SNP                                              | rs3756270     | C/G     | 108772497     | 24/56 (30.0)                            | 5/11 (31.3)            | NA                    |
| SNP                                              | rs9569        | A/G     | 108754784     | 29/51 (36.3)                            | 4/12 (25.0)            | 39.0                  |
| A single cytosine insertion (6C/7C) at +60333 bp | rs11347180    | 6C/7C   | 108800452     | 15/65 (18.8)                            | 1/15 (6.3)             | NA                    |
| A single thymine insertion (7T/8T) at +106275 bp |               | 7T/8T   | 108754510     | 2/78 (2.5)                              | 1/15 (6.3)             | NA                    |

<sup>a</sup>NA= not available.

<sup>b</sup>No. of chromosomes with the minor allele/no. of chromosomes with the common allele.

<sup>c</sup>Minor-allele frequency (%)
